# Supplementary material for: Theoretical investigations on hydrogen peroxide decomposition in aquo
Source: Royal Society of Chemistry journal article supplement (doi:10.1039/c8cp04299c), 2018-01-01

# Supporting Information

## Theoretical investigations on hydrogen peroxide decomposition in aquo

Takao Tsuneda,<sup>\*a,b</sup> and Tetsuya Taketsugu<sup>b</sup>

<sup>a</sup> Fuel Cell Nanomaterials Center, University of Yamanashi, Kofu 400-0021, Japan

<sup>b</sup> Department of Chemistry, Faculty of Science, Hokkaido University, Sapporo 060-0810,  
Japan

\* Corresponding author: [ttsuneda@yamanashi.ac.jp](mailto:ttsuneda@yamanashi.ac.jp)

Fig. S1. Molecular structures of  $\text{H}_2\text{O}_2$  decomposition reaction at each step for the explicit hydration numbers of  $\lambda=2, 4, 6$  and  $8$ . LC-BLYP/ cc-pVDZ calculations.

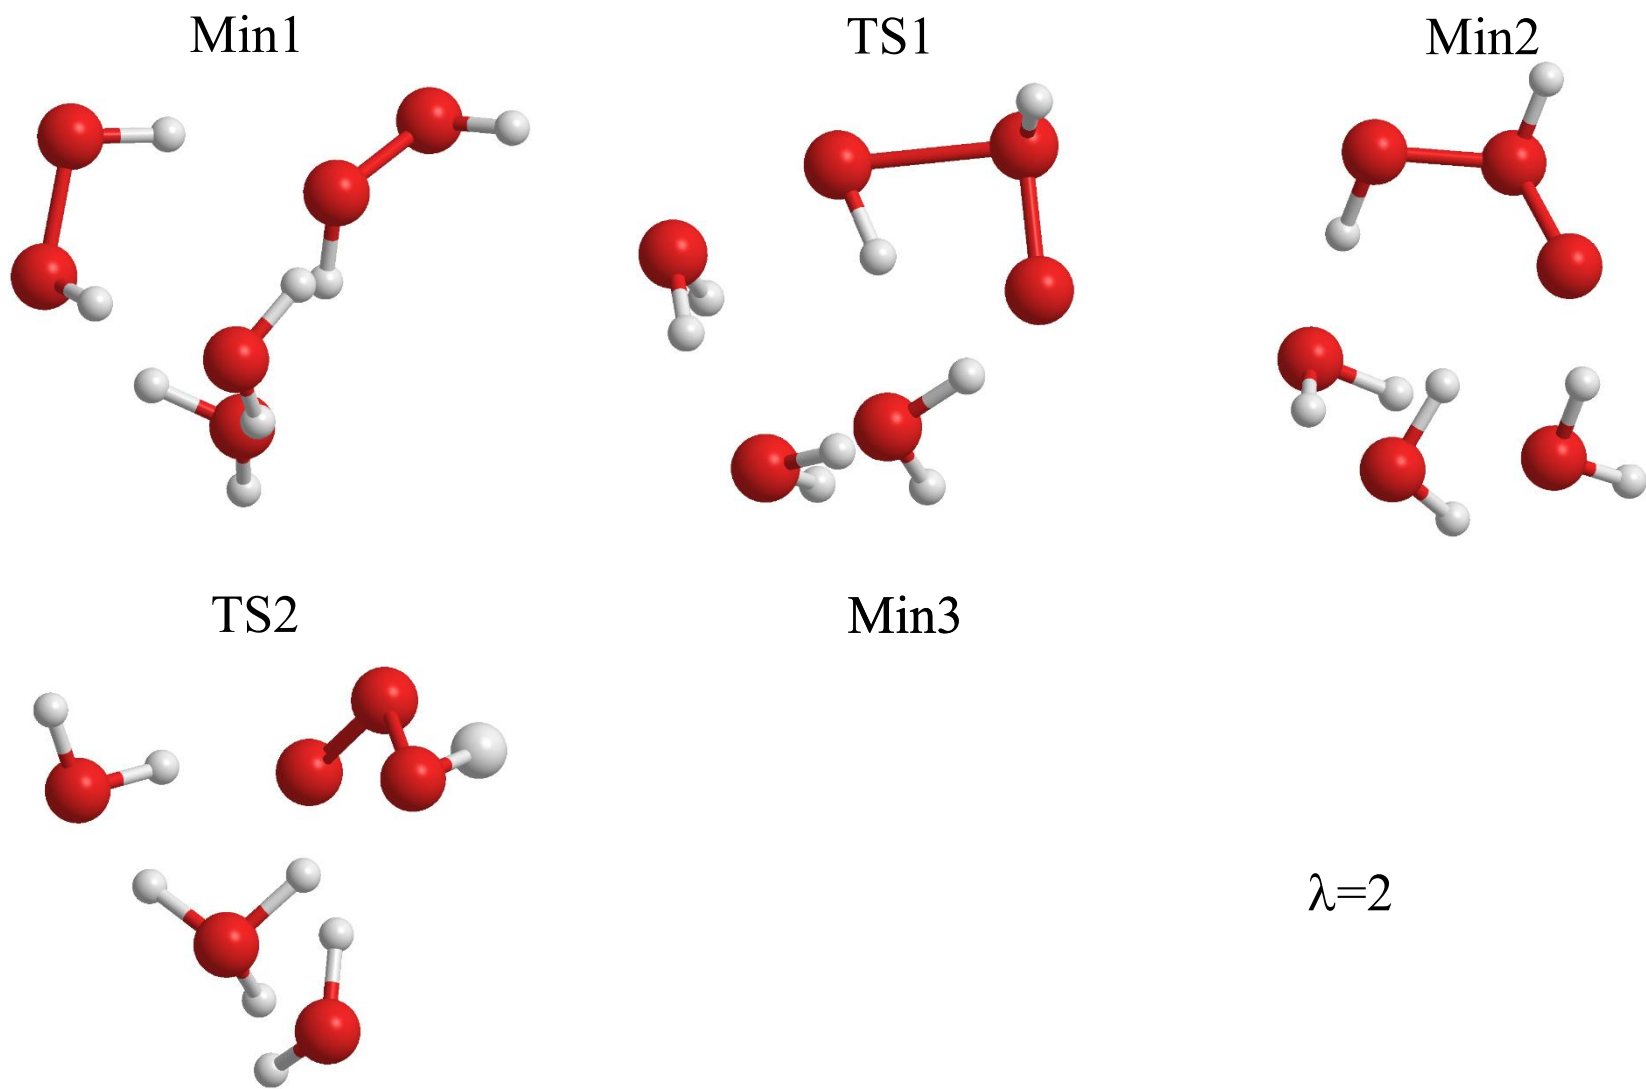

Min1

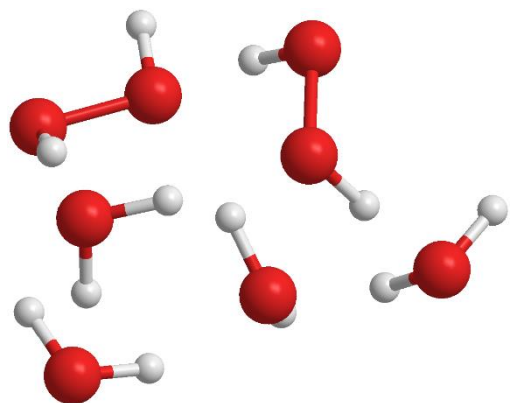

TS1

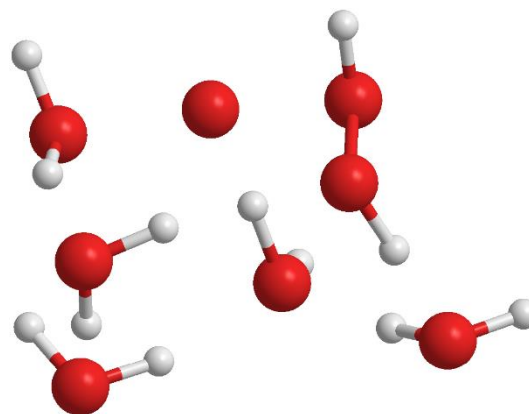

Min2

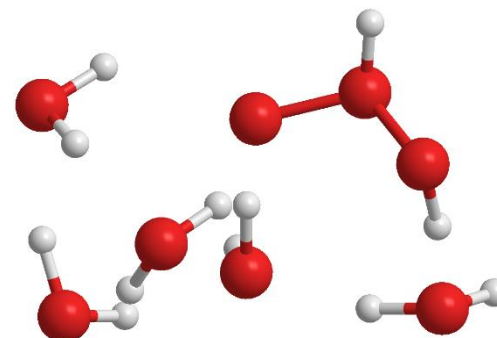

TS2

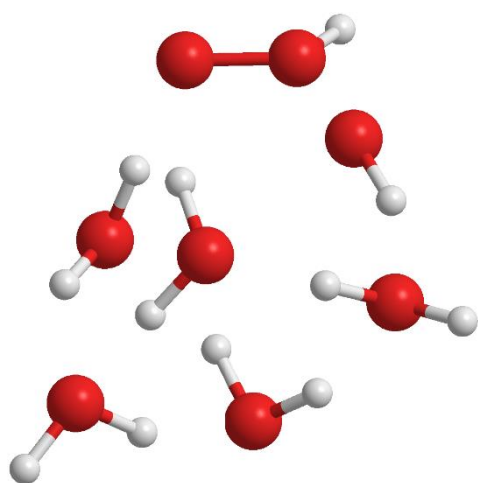

Min3

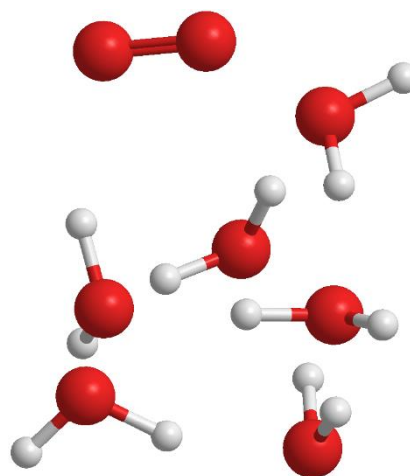

$\lambda=4$

Min1

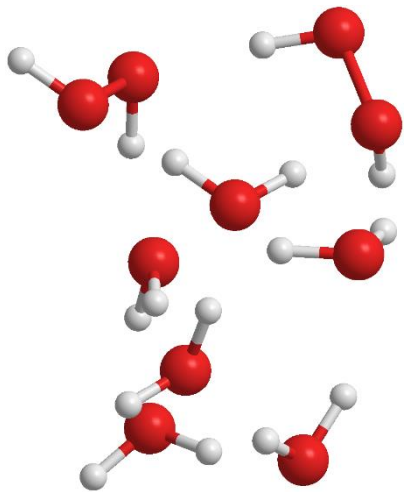

TS1

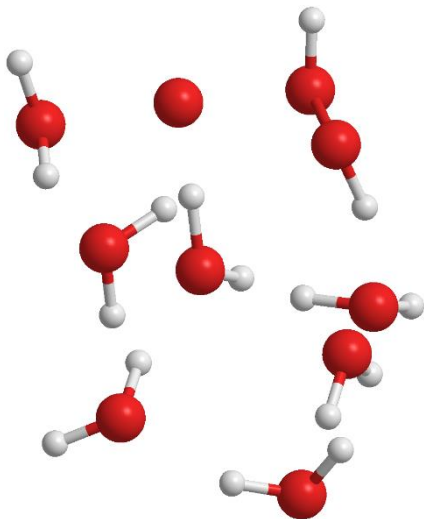

Min2

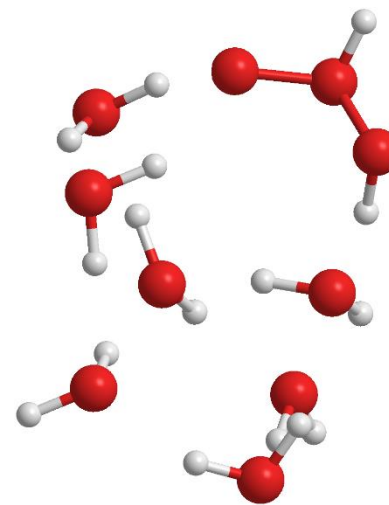

TS2

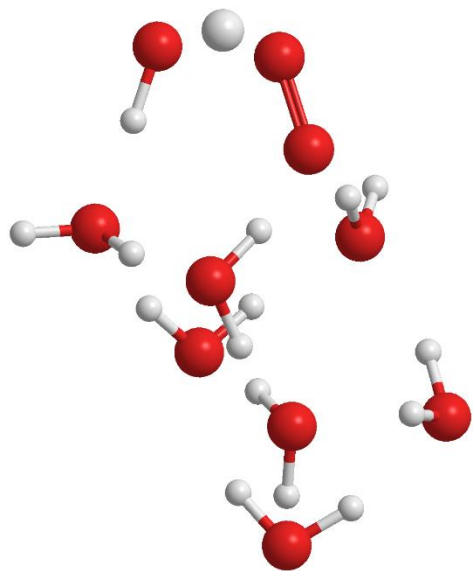

Min3

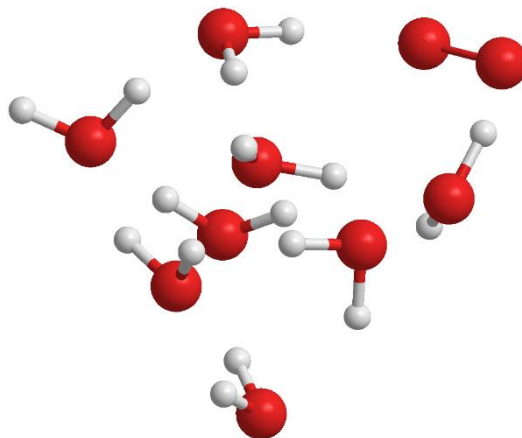

$\lambda=6$

Min1

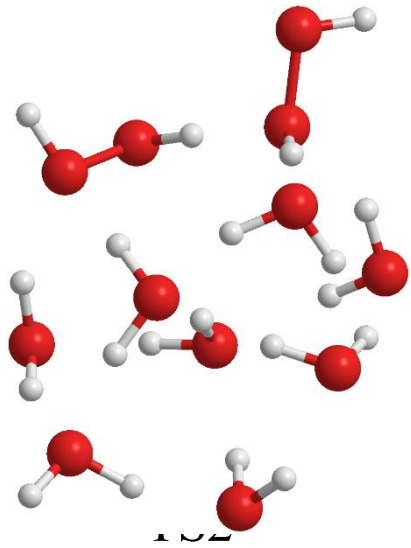

TS1

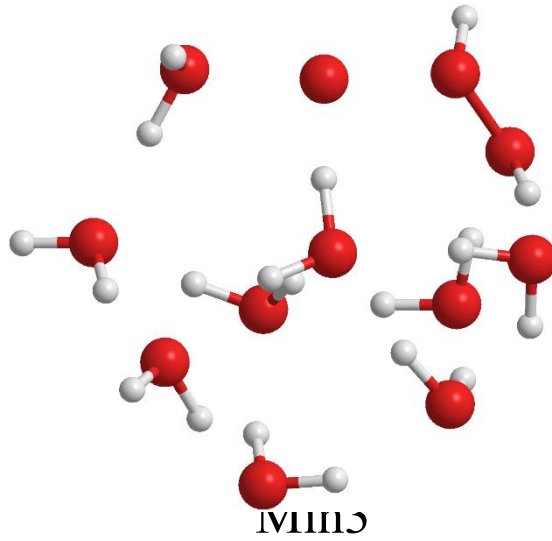

Min2

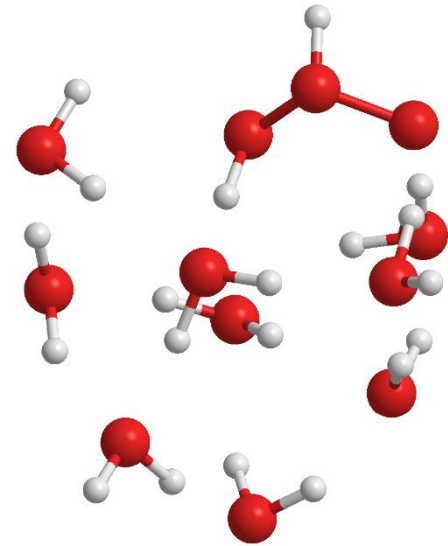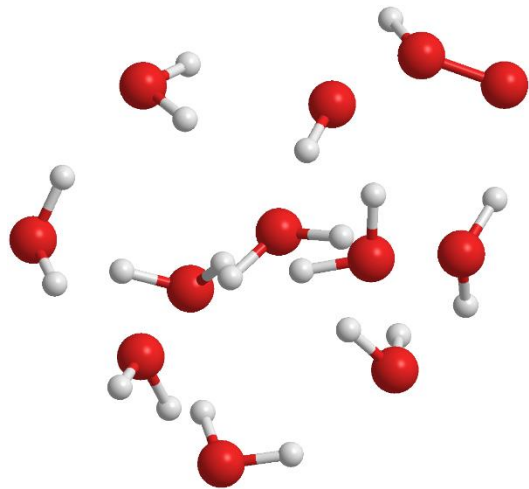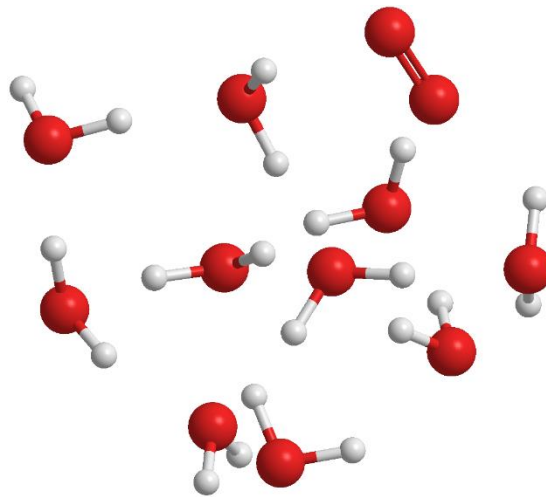

Fig. S2. Calculated vibrational spectra of OHOHO and HOOOH radicals, which are coordinated by two H<sub>2</sub>O molecules. LC-BLYP/ cc-pVDZ calculations.

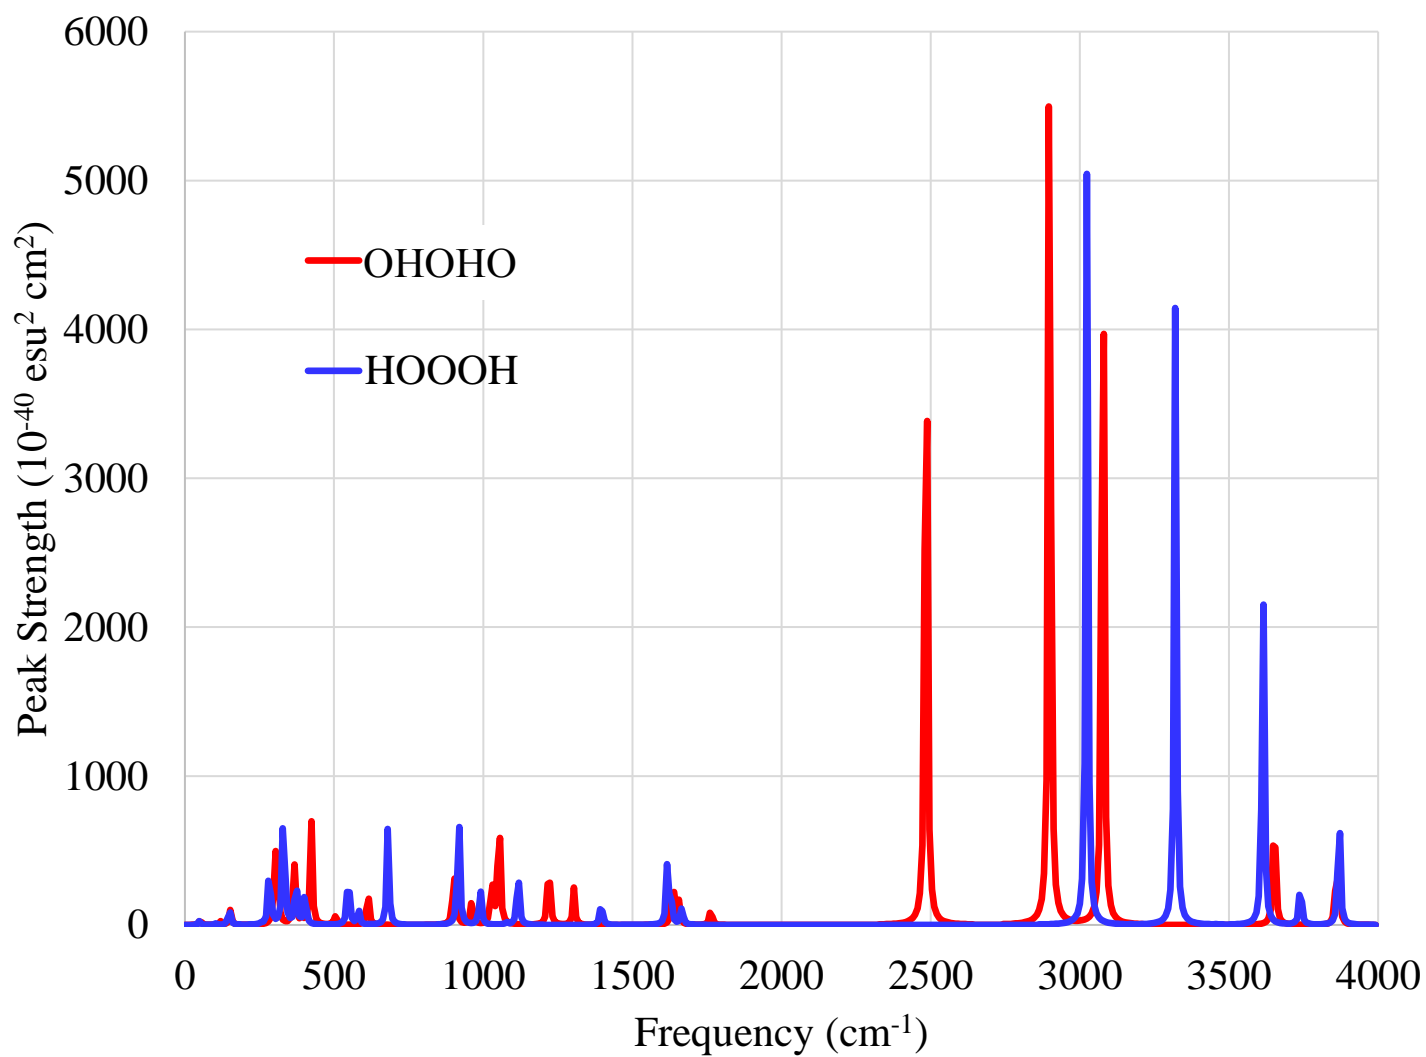

Supplement: c8cp04299c1.pdf [file c8cp04299c1.pdf]
